# Supplementary material
Source: PubMed Central journal article supplement (PMC7704715)
Supplement: NIHMS1645774-supplement-1.pdf [file NIHMS1645774-supplement-1.pdf]

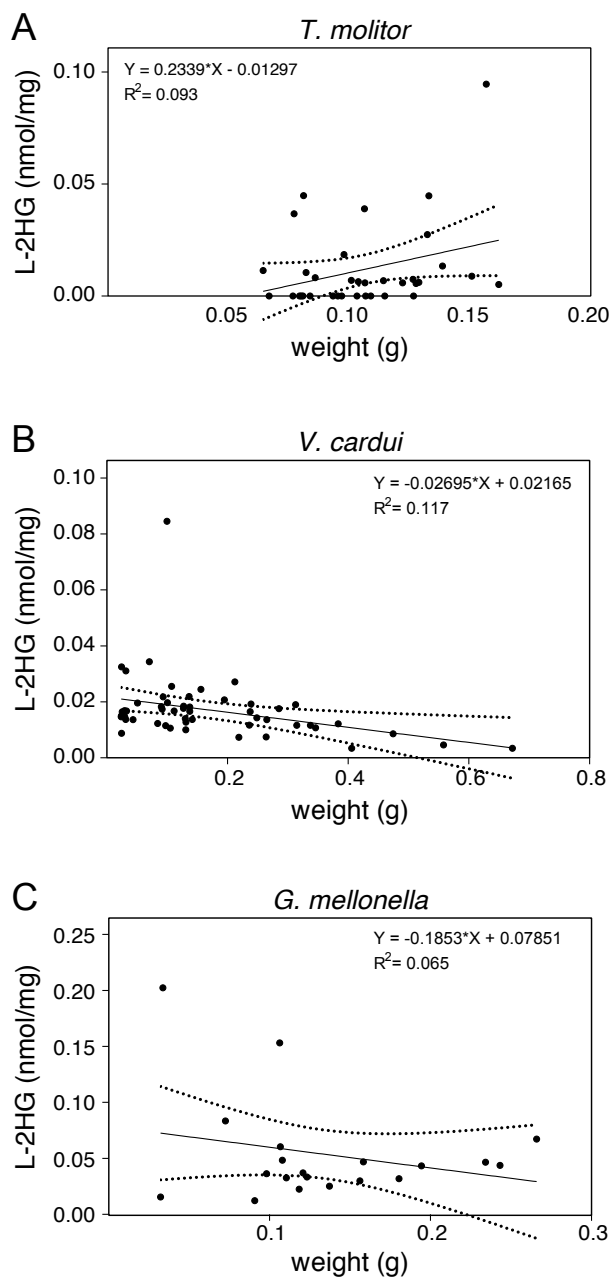

**Supplemental Figure 1. L-2HG levels during larval development of select insects.** Concentrations of L-2HG plotted relative to body mass in *T. molitor*, *V. cardui*, and *G. mellonella* larvae. Dashed lines represent the 95% confidence interval.
