# Supplementary material
Source: PubMed Central journal article supplement (PMC7704715)
Supplement: NIHMS1645774-supplement-2.pdf [file NIHMS1645774-supplement-2.pdf]

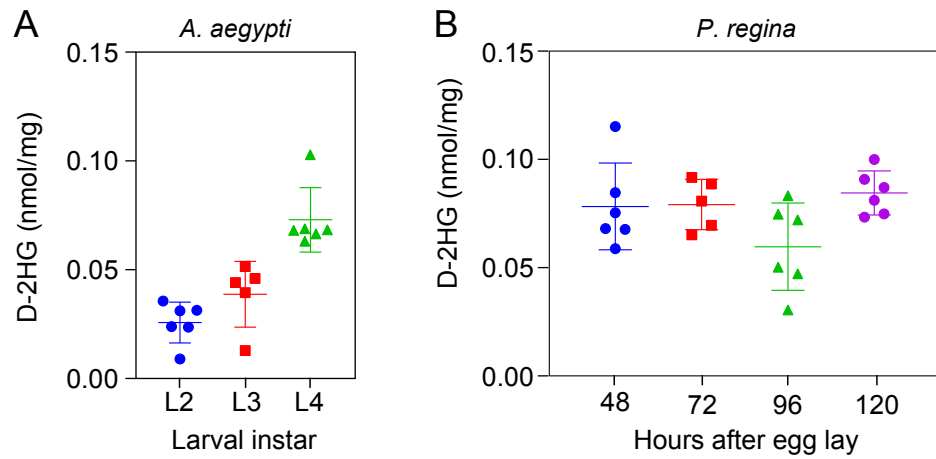

**Supplemental Figure 2. D-2HG levels during *Aedes aegypti* and *Phormia regina* larval development.** D-2HG levels were measured in (A) *Aedes aegypti* and (B) *Phormia regina* at the indicated timepoints during larval development. For *Phormia regina* (B), samples collected at the 48 hr timepoint contained L2 larvae while those collected at 72 hr, 96 hr, and 120 hr timepoints contained L3 larvae. Statistical analysis was conducted using a Kruskal-Wallis test.
