# Supplementary material
Source: PubMed Central journal article supplement (PMC7704715)
Supplement: NIHMS1645774-supplement-3.pdf [file NIHMS1645774-supplement-3.pdf]

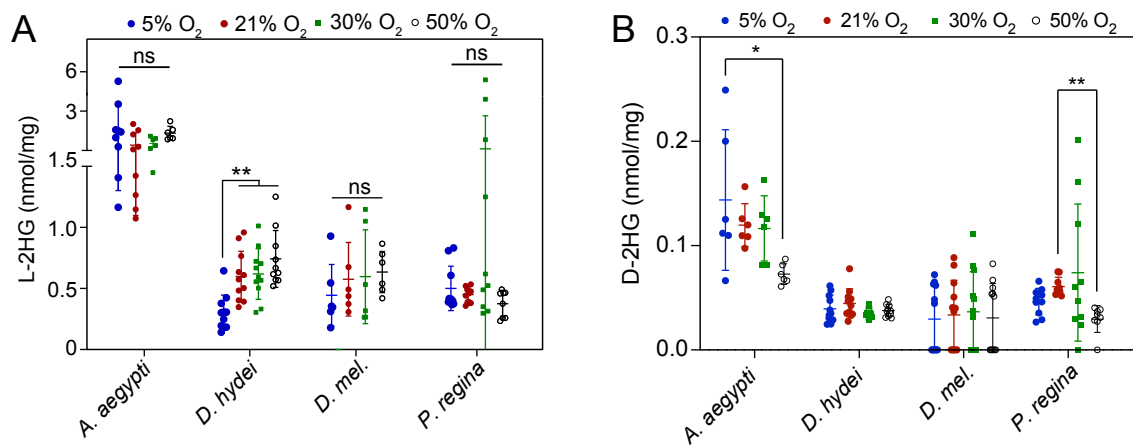

**Supplemental Figure 3. Larval L-2HG levels do not change in response to mild hypoxia or hyperoxia.** L-2HG (A) and D-2HG (B) levels were measured in select dipteran larvae following a 24 hr incubation in the presence of 5%, 21%, 30% or 50% O<sub>2</sub>. Data are presented in scatter plots with mean  $\pm$  SD. \*P<0.05. \*\*P<0.01. *P*-values calculated using an ANOVA followed by either (A) a Tukey-Kramer HSD test or (B) a Dunn's test.
